# Supplementary material for: Nutritional Profiles of Non-Dairy Plant-Based Cheese Alternatives
Source: MDPI journal article supplement (doi:10.3390/nu14061247), 2022-03-16
Supplement: s1 [file s1]

**Table S1.** 2020 Sales Data for 7 Leading Brands of Non-dairy Cheeses in USA \*

| <b>Company</b>       | <b>Sales in \$millions</b> | <b>Varieties of cheese</b> | <b># with Ca fortification</b> | <b># with Vit D fortification</b> | <b># with vit B12 fortification</b> | <b># with 5 g or more of protein</b> |
|----------------------|----------------------------|----------------------------|--------------------------------|-----------------------------------|-------------------------------------|--------------------------------------|
| Brand A              | 83.6                       | 17                         | 11                             | 0                                 | 3                                   | 0                                    |
| Brand B              | 43.8                       | 19                         | 7                              | 0                                 | 0                                   | 0                                    |
| Brand C              | 29.8                       | 21                         | 1                              | 0                                 | 21                                  | 0                                    |
| Brand D              | 24.5                       | 8                          | 0                              | 0                                 | 0                                   | 0                                    |
| Brand E              | 13.7                       | 22                         | 7                              | 0                                 | 0                                   | 0                                    |
| Brand F              | 8.8                        | 3                          | 3                              | 0                                 | 0                                   | 0                                    |
| Brand G              | 5                          | 10                         | 3                              | 0                                 | 0                                   | 0                                    |
| Totals for Brand A-G |                            | 100                        | 32                             | 0                                 | 24                                  | 0                                    |
| % of 245 cheeses     |                            | 41%                        | 13%                            | 0                                 | 10%                                 | 0                                    |

\* ref. 20

**Table S2.** Mean (Quartile 1–Quartile 3) of 5 nutrients per serving for non-dairy and dairy cheeses in different formats \*.

| <b>Cheese Format</b>     | <b>n</b>  | <b>Calories</b>     | <b>Sat fat</b>    | <b>Sodium</b>        | <b>Protein</b> | <b>Calcium</b>    |
|--------------------------|-----------|---------------------|-------------------|----------------------|----------------|-------------------|
| <b>Non-dairy</b>         |           |                     |                   |                      |                |                   |
| Blocks and Wheels        | 11        | 80 (75–125)         | 2 (1.5–4)         | 190 (150–215)        | 3 (1–4)        | 0 (0–1)           |
| Slices                   | 4         | 60 (60–62.5)        | 4 (3.875–4.125)   | 180 (177.5–202.5)    | 0 (0–0.75)     | 5 (0–10)          |
| Shreds                   | 5         | 80 (70–90)          | 3.5 (2.5–5)       | 250 (230–260)        | 1 (0–1)        | 0 (0–2)           |
| Others                   | 7         | 90 (70–95)          | 3.5 (1–6)         | 170 (142.5–210)      | 2 (0–3)        | 2 (1–4)           |
| Total                    | 27        | 80 (60–100)         | 3.5 (1.5–4.75)    | 190 (170–240)        | 1 (0–3)        | 0 (0–4)           |
| <b>Dairy</b>             |           |                     |                   |                      |                |                   |
| Blocks and Wheels        | 11        | 70 (70–80)          | 3.5 (2.75–3.75)   | 190 (97.5–220)       | 7 (5.5–8)      | 15 (9–20)         |
| Slices                   | 14        | 70 (60–70)          | 2.5 (2.5–3)       | 122.5 (97.5–165)     | 6 (5.25–6.75)  | 15 (10–15)        |
| Shreds                   | 10        | 80 (70–80)          | 2.5 (1–3)         | 185 (170–225)        | 8 (7.25–8)     | 20 (15–20)        |
| Ricotta & Farmers Cheese | 6         | 80 (80–80)          | 2.5 (2.5–2.875)   | 60 (33.75–63.75)     | 5 (4–6)        | 10 (8.5–13.75)    |
| Feta                     | 5         | 50 (35–70)          | 2 (0–2.5)         | 340 (340–340)        | 6 (6–6)        | 8 (8–10)          |
| Snacks                   | 14        | 60 (50–70)          | 2.5 (2–3)         | 160 (140–160)        | 6 (5–6)        | 10 (10–10)        |
| Spreadable & Brie        | 6         | 47.5 (37.5–57.5)    | 2.25 (1.25–2.875) | 170 (152.5–180)      | 2 (2–2)        | 10 (5.5–10)       |
| <b>Total</b>             | <b>66</b> | <b>70 (60–77.5)</b> | <b>2.5 (2–3)</b>  | <b>160 (120–190)</b> | <b>6 (5–7)</b> | <b>10 (10–15)</b> |

\* Statistical analyses were performed on the raw data presented in ref. 20.

**Table S3.** Percentage of dairy and non-dairy cheeses meeting or exceeding a nutrient guideline per serving \*.

| <b>Nutrient Parameter</b>  | <b>Dairy</b> | <b>Non-dairy</b> |
|----------------------------|--------------|------------------|
| At least 5 g protein       | 83           | 11               |
| At least 10% DV of Calcium | 80           | 19               |
| Over 1 g saturated fat     | 88           | 81               |
| 230 mg of sodium or more   | 15           | 33               |

\* Statistical analyses were performed on the raw data presented in ref. 20
